# Supplementary material for: Blocking the GITR-GITRL pathway to overcome resistance to therapy in sarcomatoid malignant pleural mesothelioma
Source: PubMed Central journal article supplement (PMC8313521; doi:10.1038/s42003-021-02430-5), 2021-07-26
Supplement: 42003_2021_2430_MOESM1_ESM.pdf [file 42003_2021_2430_MOESM1_ESM.pdf]

## **Description of Additional Supplementary Files**

**File Name:** Supplementary Data 1

**Description:** Dataset source for figures 1b, 1d, 2a, 4b, 4d, 5c, 6a, 6b, 6c, 6d, 6e (Excel file).

**File Name:** Supplementary Data 2

**Description:** Microarray data deposited in ArrayExpress.
