# Supplementary material for: Blocking the GITR-GITRL pathway to overcome resistance to therapy in sarcomatoid malignant pleural mesothelioma
Source: PubMed Central journal article supplement (PMC8313521; doi:10.1038/s42003-021-02430-5), 2021-07-26
Supplement: 42003_2021_2430_MOESM2_ESM.pdf [file 42003_2021_2430_MOESM2_ESM.pdf]

## 1 **Supplementary Materials:**

### 2 **Materials and Methods**

#### 3 **Cell viability assay**

4 Human mesothelioma CRL5946 cells (American Type Culture Collection, ATCC) were  
5 detached and suspended in RPMI 1640 medium (Gibco, Thermo Fisher Scientific) and exposed to  
6 cisplatin in different concentrations at 0.5, 1, 2, and 4  $\mu\text{g}/\text{mL}$  overnight or  $\gamma$ -ray radiation (Atomic  
7 Energy of Canada, Ltd, Ottawa, Canada) in different dosage at 2.5, 5, 7.5, and 7.5 Gy and then  
8 seeded onto 6-well culture plates. We replaced the culture medium 24 hours later. For short-term  
9 cytotoxicity determination, we initially loaded  $10^5$  cells onto each well. After 4 days of  
10 incubation, we washed twice with warm PBS and resuspended the attached cells in medium. Then  
11 the number of viable cells were counted by Cell Counter (Vi-CELL XR, BECKMAN  
12 COULTER).

#### 13 **Real-time reverse transcription PCR analysis**

14 Human mesothelioma CRL5946 cells were exposed to 2  $\mu\text{g}/\text{mL}$  cisplatin or 7.5 Gy Cs-137  
15 irradiation for indicated time points. Total RNA was extracted from cells by using QIAzol Lysis  
16 Reagent (QIAGEN) and RNeasy Microarray Tissue Mini Kit (QIAGEN). cDNA was synthesized  
17 with High Capacity cDNA Reverse Transcription Kit (ThermoFisher Scientific) on a C1000  
18 Touch™ Thermal Cycler (BIORAD) following manufacturer's protocols. Regular PCR was done  
19 to establish reverse transcription PCR (RT-PCR) standards of all targets genes including GITRL,  
20 GTR, and housekeeping gene HPRT1. DNA fragments were obtained from regular PCR on a  
21 C1000 Touch™ Thermal Cycler (Bio-Rad). A probe-based real-time PCR approaches for  
22 quantitative measurement of targets genes was carried out on the CFX384 Touch real-time PCR  
23 detection system (BIO-RAD). PCR composed of 20X PrimePCR Probe Assay, 2X  
24 SsoAdvanced™ Universal Supermix, 2ul 25ng/ul cDNA X 45 cycles. The Probes of PrimePCR  
25 Probe Assay of house-keeping gene and all target genes were purchased from BIO-RAD

26 Laboratories, Inc.

27 **Flow cytometry analysis**

28 Cultured CRL5946 cells were detached from culture plate and resuspended in EasySep  
29 buffer (STEMCELL Tech.). The sequential sorting of GITR-GITRL+, GITR+GITRL- and GITR-  
30 GITRL- was done by using human-specific antibodies: GITRL-PE conjugated (Clone#109101,  
31 R&D Systems Co.) and GITR-PE conjugated (Clone#621, BioLegend Inc.) and EasySep™  
32 Release Human PE Positive Selection Kit following the manufacturer's instructions. Sorted cells  
33 were culture in RPMI 1640 medium for 0, 7, and 16 days, separately. For staining surface GITR  
34 and GITRL, Cells were stained for 10 minutes at 4 °C with a CD16/CD32 Fc block (BioLegend  
35 Inc.) and then a combination of the following human-specific antibodies: GITRL-APC conjugated  
36 (Clone#109101, R&D Systems Co.) and GITR-PE conjugated (Clone#621, BioLegend Inc.). All  
37 samples were then washed twice with FACS buffer and fixed with 2% Paraformaldehyde for at  
38 least 30 minutes. BD LSR II flow cytometer (BD Biosciences) and FlowJo V10 software (FlowJo  
39 LLC) was then used to analyze the expression of GITR and GITRL on MPM cells.

40

41

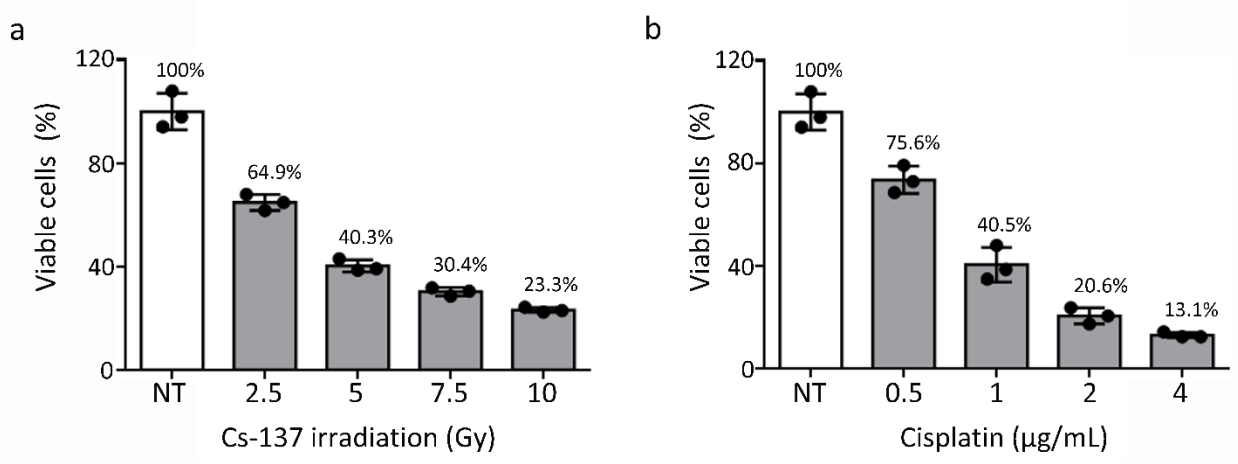

42

43

44 **Fig. S1.** Dosage-dependent cytotoxicity of Cisplatin and Cs-137 irradiation in CRL5946 MPM  
45 cells. Representative figure showed the relative number of viable cells of CRL5946 MPM cells 96  
46 hours after different dosage of Cs-137 irradiation (A) and cisplatin exposure (B). NT: No  
47 Treatment.

48

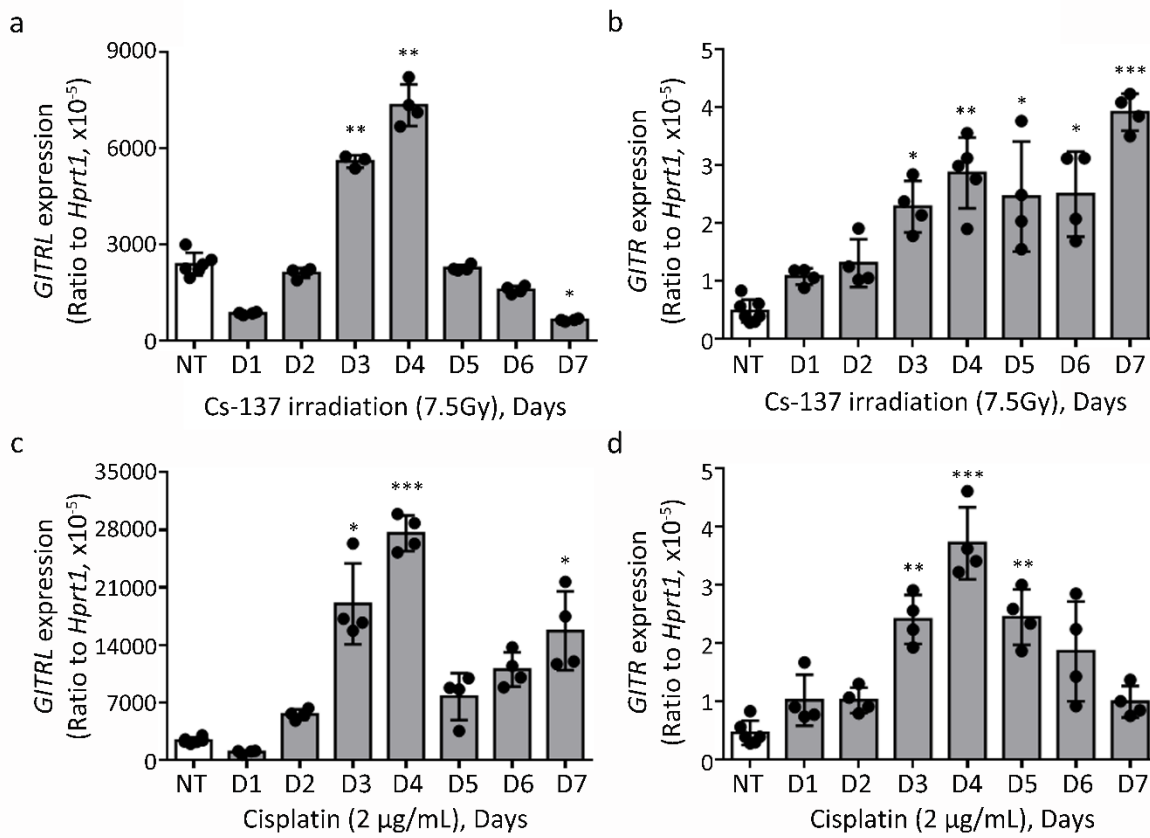

49

50 **Fig. S2.** Increased of GITRL and GTR expression in CRL5946 treated with Cs-137 or cisplatin

51 in a time-depend manner. Representative figures showed the change of GTR and GITRL

52 expression in CRL5946 cells by time after 7.5 Gy Cs-137 irradiation (**A** and **B**) or 2µg/ml

53 cisplatin treatment (**C** and **D**). The results of qRT-PCR showed the expression level of GTR and

54 GITRL relative to house-keeping gene, Hprt1. NT: No Treatment. \* $P < 0.05$ ; \*\* $P < 0.01$ ;

55 \*\*\* $P < 0.001$  determined by Mann-Whitney U test.

56

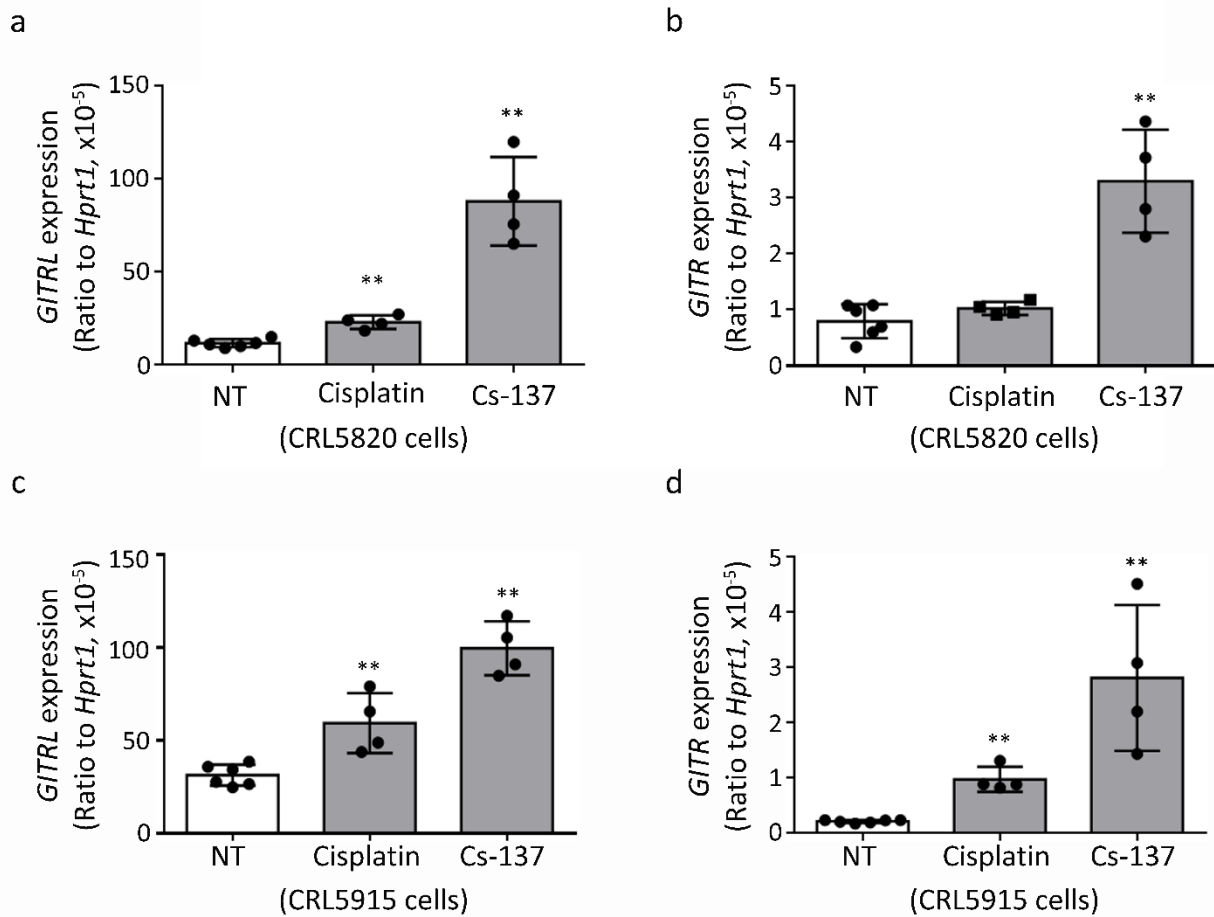

57

58 **Fig. S3.** Increased of GITR and GITRL expression in CRL5820 and CRL5915 treated with Cs-  
 59 137 or cisplatin. CRL5820 or CRL5946 cells were exposed to 2 ug/mL cisplatin for 24 hours or  
 60 7.5Gy Cs-137 irradiation. The mRNA was collected 4 days later for qRT-PCR analysis of GITR  
 61 and GITRL. The expression of GITR and GITRL were increased in CRL5820 (A and B) and  
 62 CRL5915 (C and D) cells, compared with non-treated (NT). \*\* $P < 0.01$  determined by Mann-  
 63 Whitney U test.

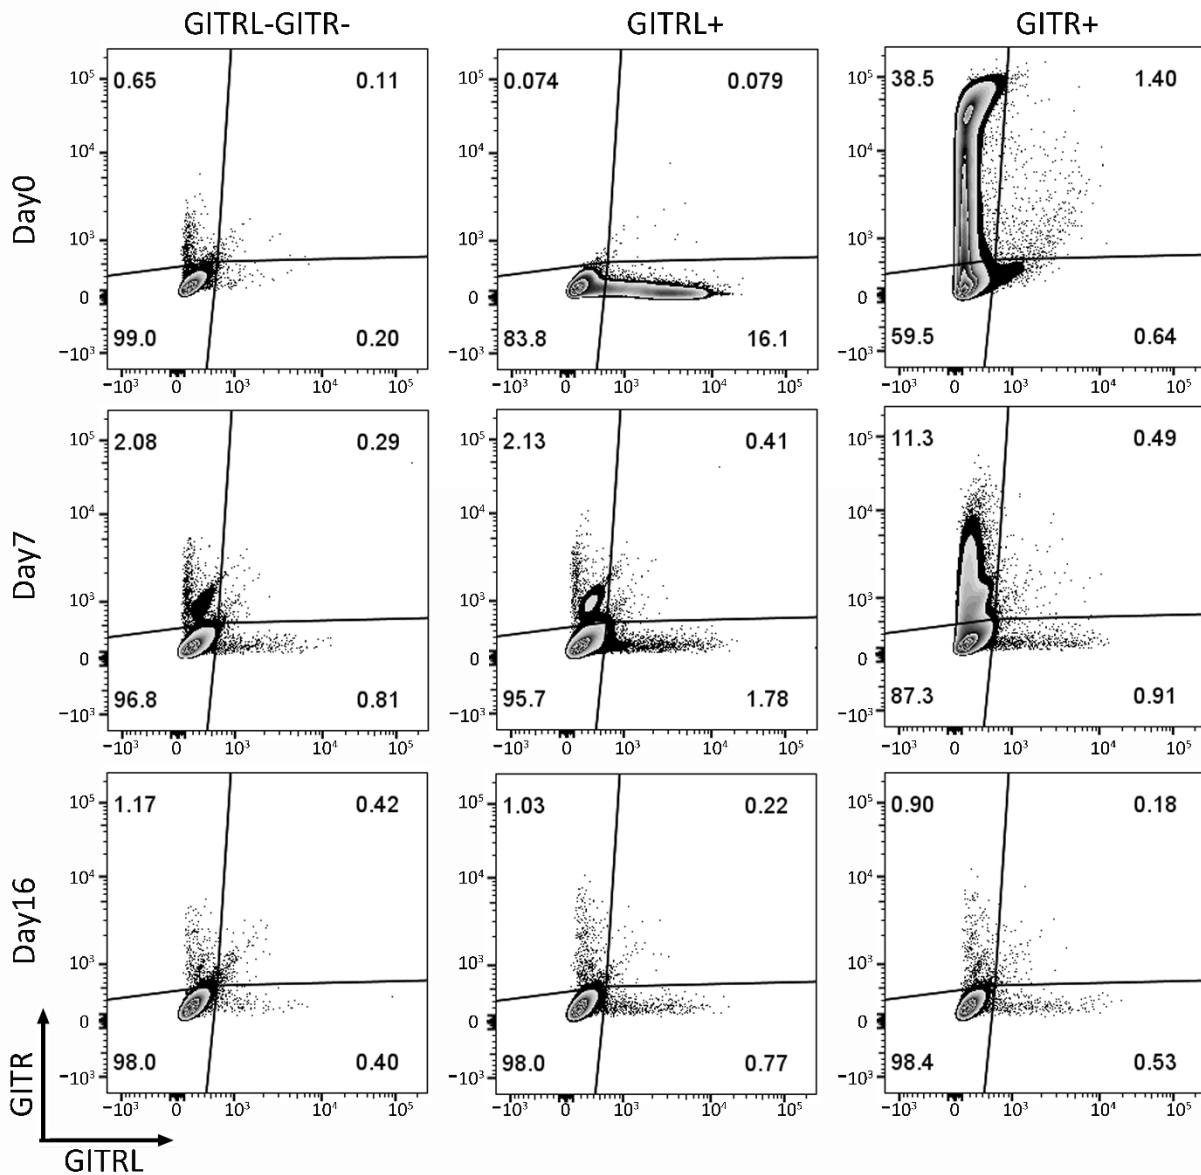

64

65 **Fig. S4.** The stochastic interconversion of phenotype contributes to heterogeneity of CRL5946  
 66 cells. The GITR+, GITRL+ and GITR-GITRL- cells of CRL5946 cells were sequentially sorted  
 67 by using magnetic beads methods. After sorting, the GITR+ sorted group can reach up to 38.5%,  
 68 the GITRL+ sorted group can reach up to 16.1 % (upper panel). After cultivating on plate for 7  
 69 days, the distribution of GITR+ and GITRL+ cells gradually went back to normal distribution  
 70 (middle panel). After cultivating on plate for 16 days, the distribution of GITR+ and GITRL+ was  
 71 totally back to normal equilibria among the three initially sorted subpopulations.

72

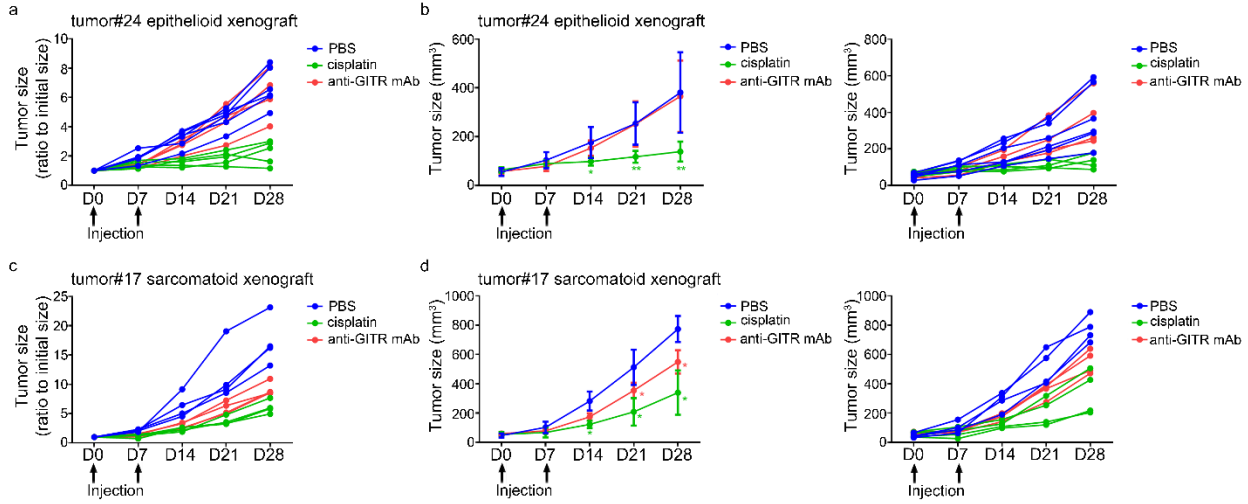

74

75

76 **Fig. S5.** The individual tumor growth is presented in a ratio to initial size (normalized) for the  
 77 tumor#24 epithelioid xenograft (A) and tumor#17 sarcomatoid xenograft (C). The average tumor  
 78 size (left panel) as well as the individual figure size (right panel) for each mouse is then presented  
 79 for the epithelioid xenograft (B) and for the sarcomatoid xenograft (D).

80

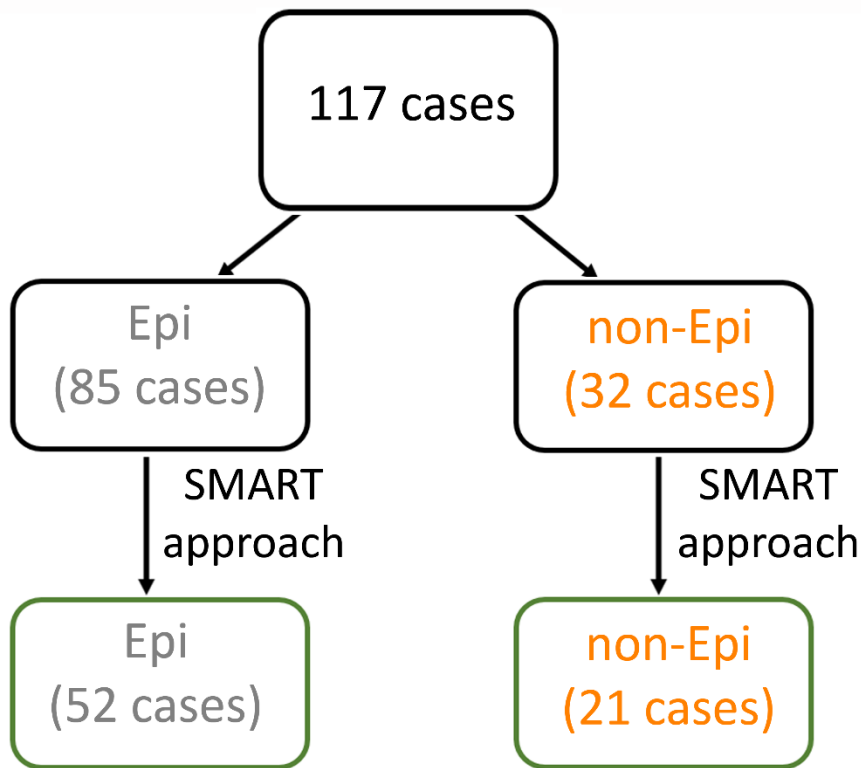

## Surgery for Mesothelioma After Radiation Therapy

81

82

83

84

85

86

87

88

**Fig. S6.** Demographics of MPM patients who were evaluated in our institution from November 2003 to October 2016. A total of 117 MPM cases were assessed with pathology blocks available for immunostaining. There were 85 cases of epithelioid subtype and 32 cases of non-epithelioid subtype histologically. In total, 73 cases including 52 epithelioid subtype and 21 non-epithelioid subtype received surgery for mesothelioma after radiation therapy (SMART).



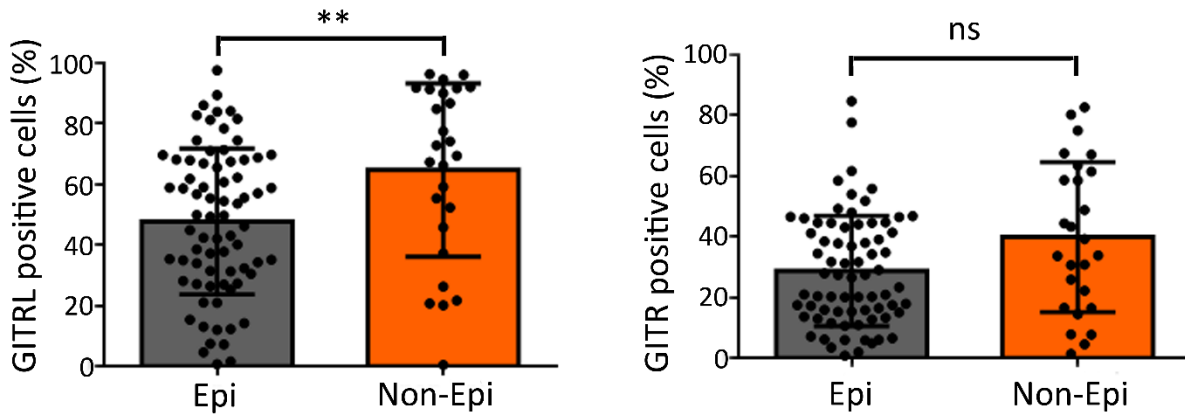

90

91

92 **Fig. S7.** Immunohistochemistry staining showed that the percentage of GITRL and GTR positive cells

93 were higher in non-epithelioid subtype than in epithelioid subtype. Immunohistochemistry results

94 were quantified by Definiens TissueStudio 4.0 software. \*\*  $p = 0.01$ , determined by Mann-

95 Whitney U test.

96

97

98

99

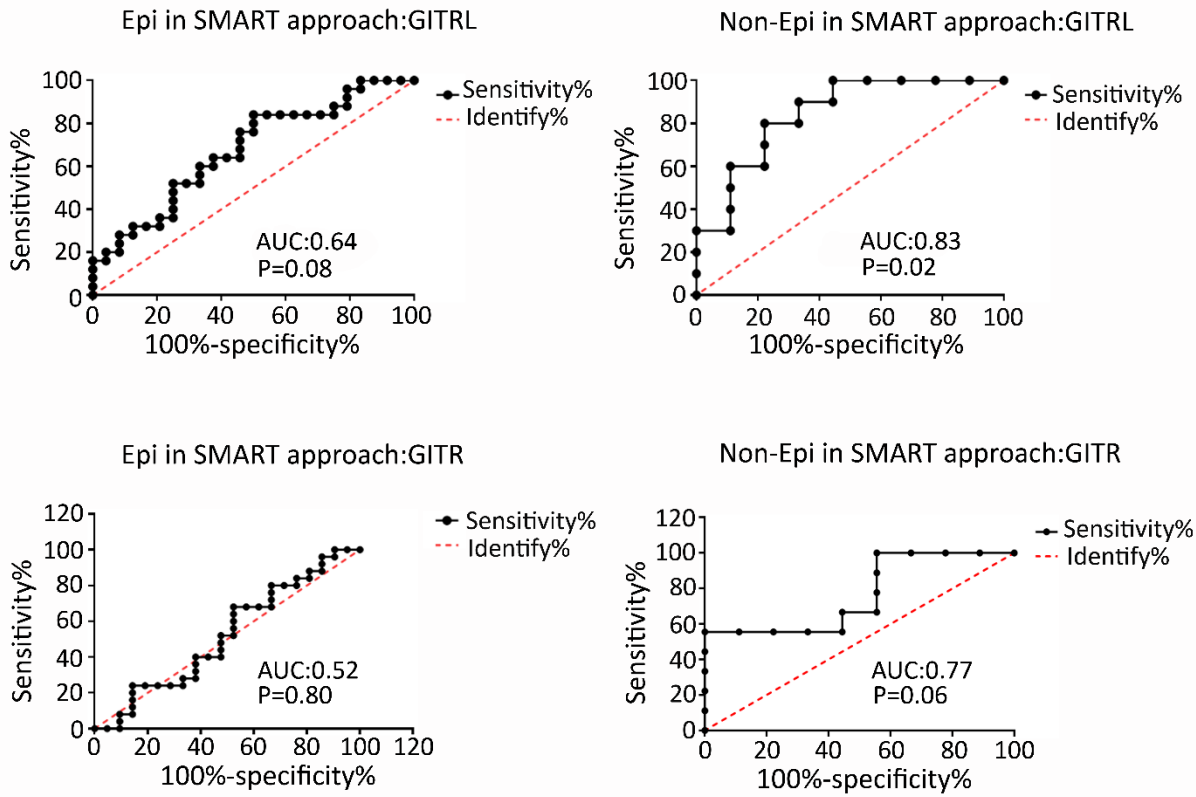

101

102

103 **Fig. S8.** ROC curve based on the average intensity of GITR and GITRL for predicting better or  
104 worse survivals than the median survival in patients with Epi. and non-Epi. subtype after SMART  
105 approach.

106

107

6 x 10<sup>6</sup> cells X 10 dishes/each group

6 x 10<sup>6</sup> viable cells/mouse

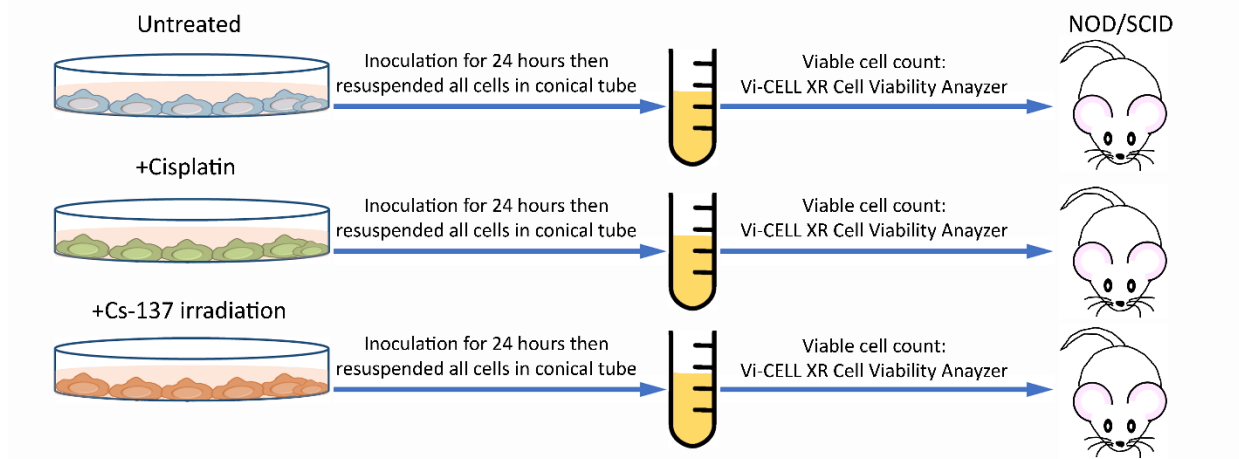

108

109 **Fig. S9.** Schematic representation of the in vivo experiments.

110

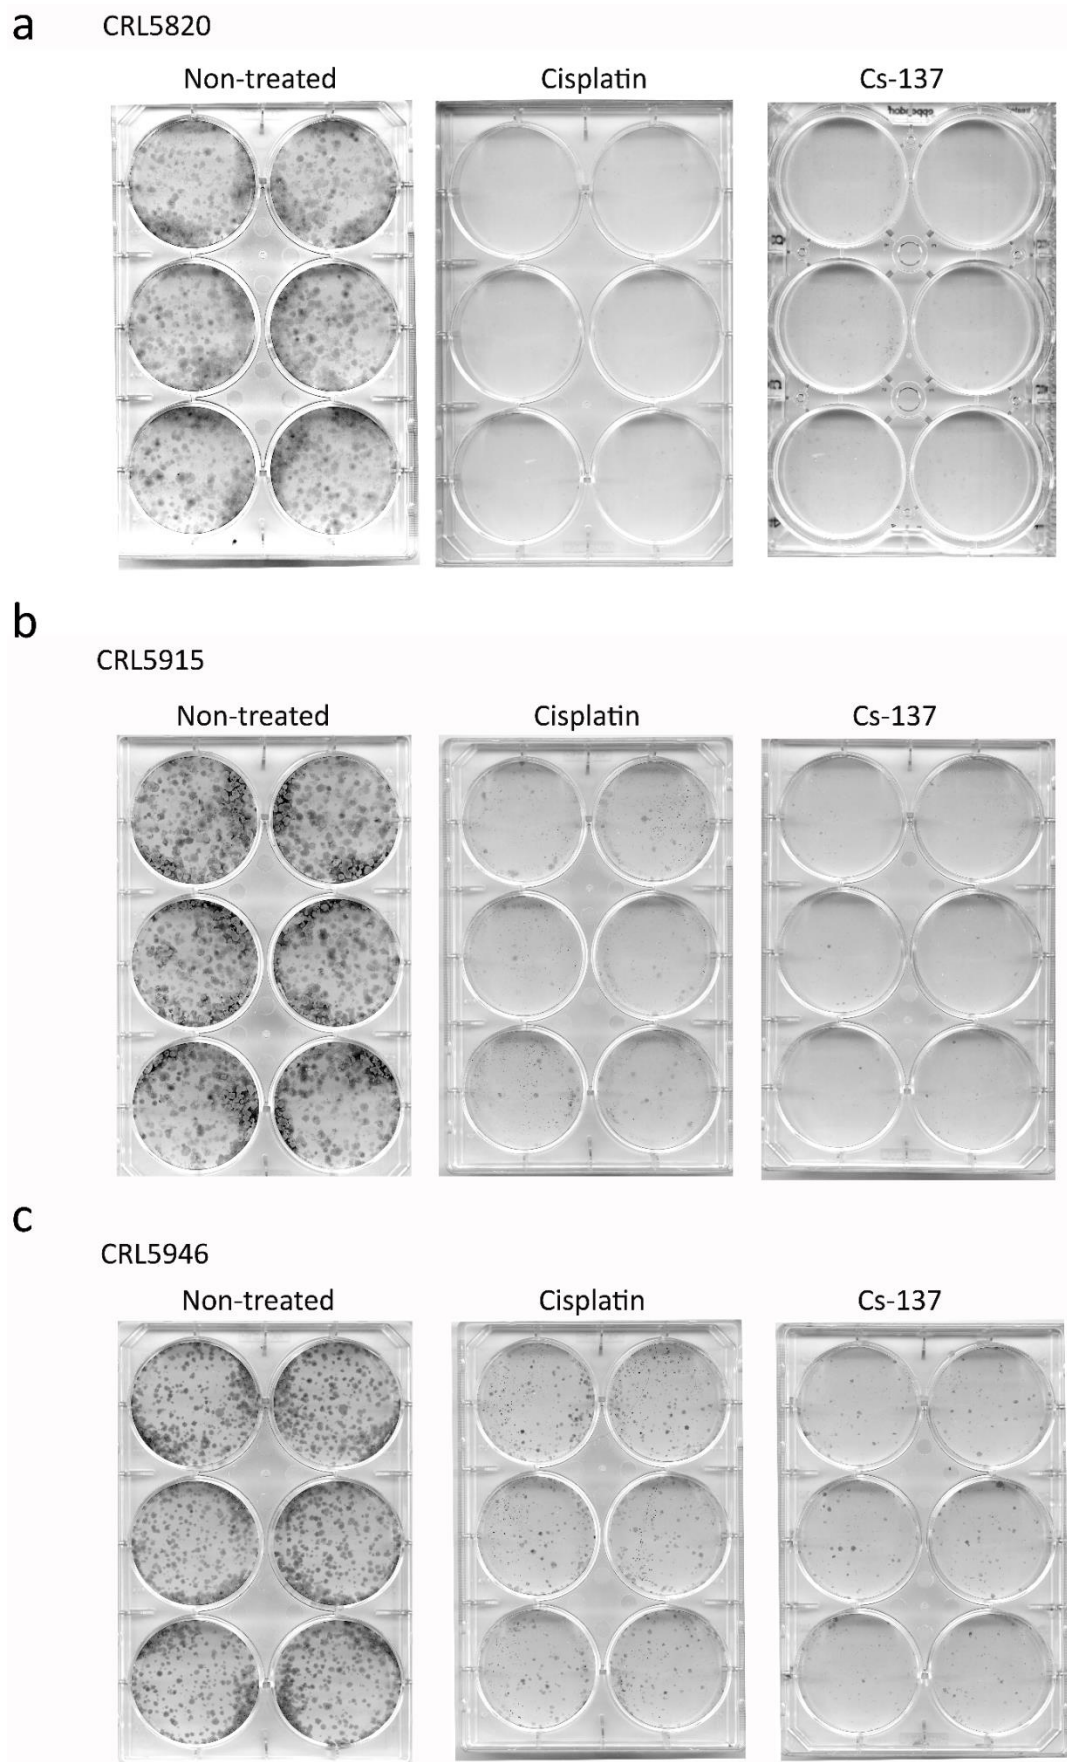

111

112 **Fig. S10.** Original results shown in Figure 1E.

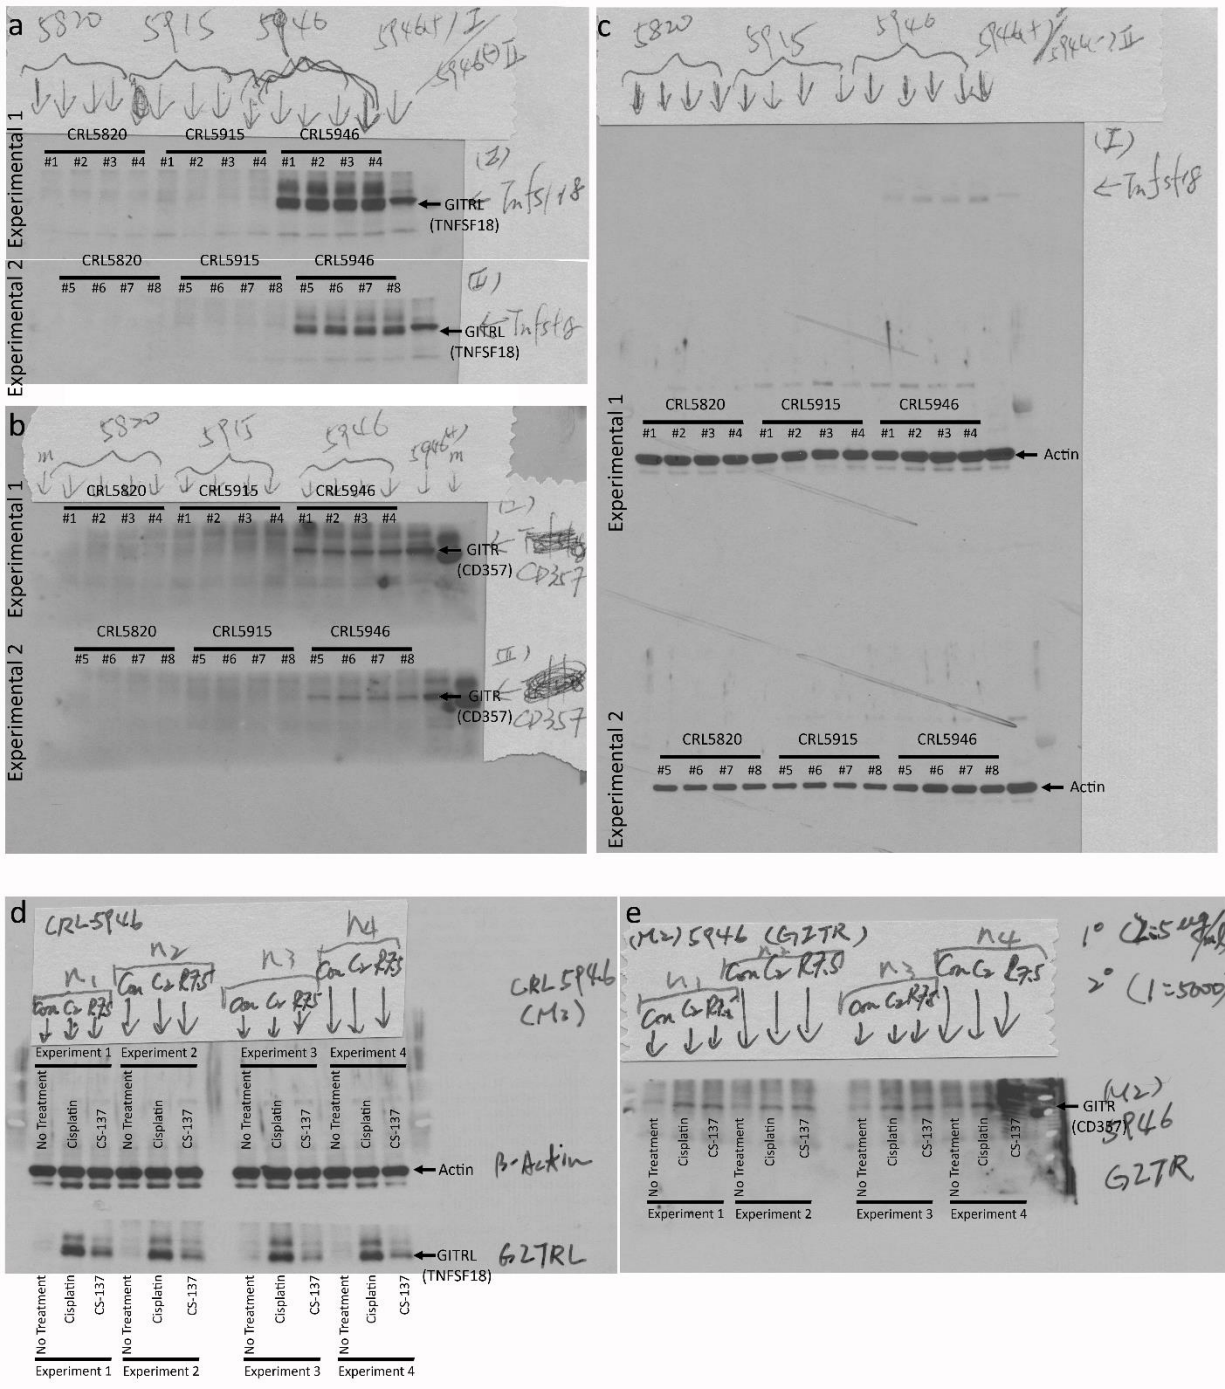

115 **Fig.S11.** Supplementary of unprocessed western  
 116 blot results of GITRL, G2TRL and G2TR respectively in Fig 1C. (D and E) Unprocessed western  
 117 blot results of GITRL, Actin, and G2TR represented in Fig 2B.
